# Supplementary material for: Exogenous Application of Polycationic Nanobactericide on Tomato Plants Reduces the Candidatus Liberibacter Solanacearum Infection
Source: MDPI journal article supplement (doi:10.3390/plants10102096), 2021-10-03
Supplement: s1 [file s1]

## Supplementary materials

Figure S1 shows the  $^1\text{H}$  NMR analysis of the isolated copolymer revealed the presence of  $\omega$ -RAFT end groups ( $\delta$ = 7.83, 7.45 and 7.30 ppm) and the characteristic signals derived from DMAEMA ( $\delta$ = 1.2 (-C-CH<sub>3</sub>), 2.6 (-CH<sub>2</sub>-N), 2.2 (-N-(CH<sub>3</sub>)<sub>2</sub>), and 3.9-4.1 ppm (-O-CH<sub>2</sub>)) and BMA ( $\delta$ = 0.85 (-CH<sub>2</sub>-CH<sub>3</sub>), and 3.8-3.9 ppm (-O-CH<sub>2</sub>)). The values of integrals of the -O-CH<sub>2</sub> (i,c) groups of both co-monomers allowed to calculate the copolymer composition, which corresponds to 29 % of BMA units.

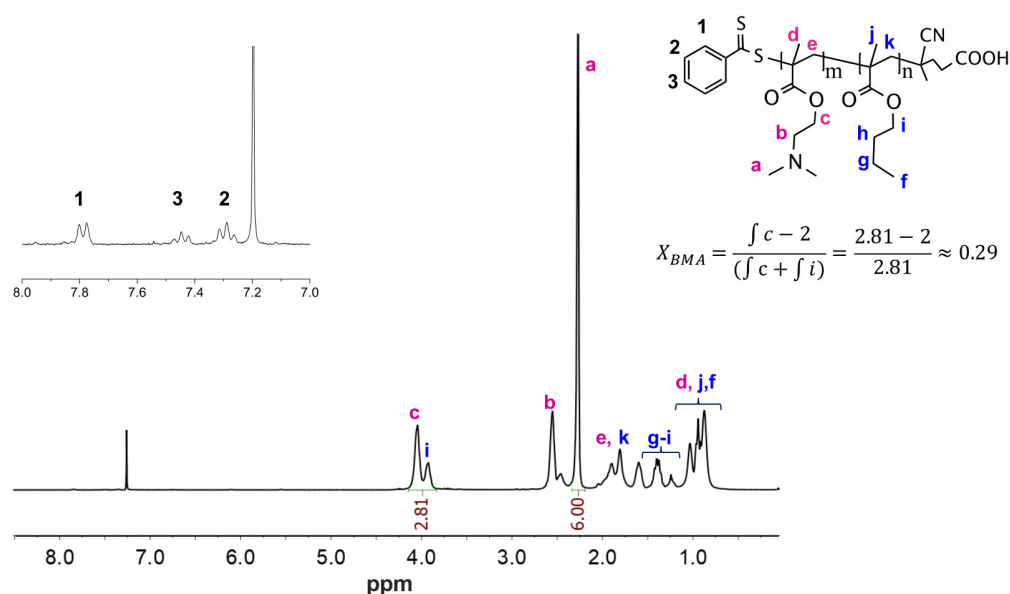

**Figure S1.**  $^1\text{H}$  NMR spectrum of P(DMAEMA-co-BMA), recorded in  $\text{CDCl}_3$ , with peak assignments. Inset is an expanded region highlighting the presence of the  $\omega$ -RAFT end group protons.

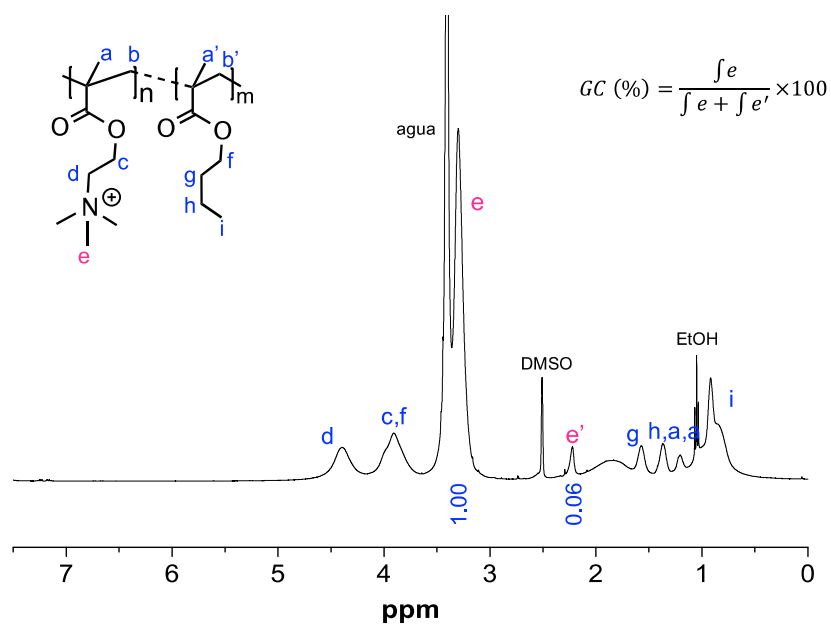

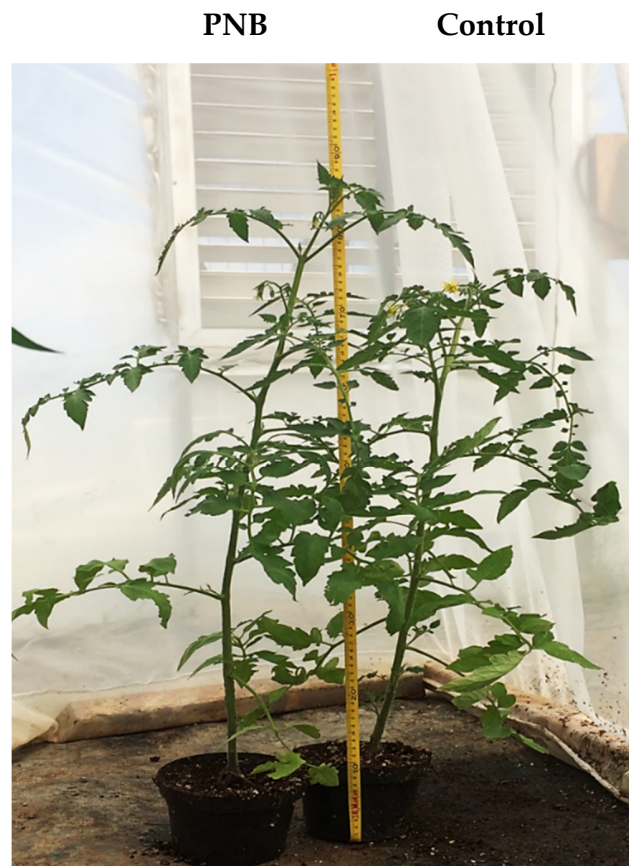

**Figure S3.** Healthy plants of tomato (*Solanum lycopersicum*) at 21 days of treatment with 70 ppm of PNB (**PNB**) and water treated (**Control**). Plants were grown in greenhouse conditions in absence of *Bactericera cockerelli* and *Candidatus Liberibacter solanacearum*.

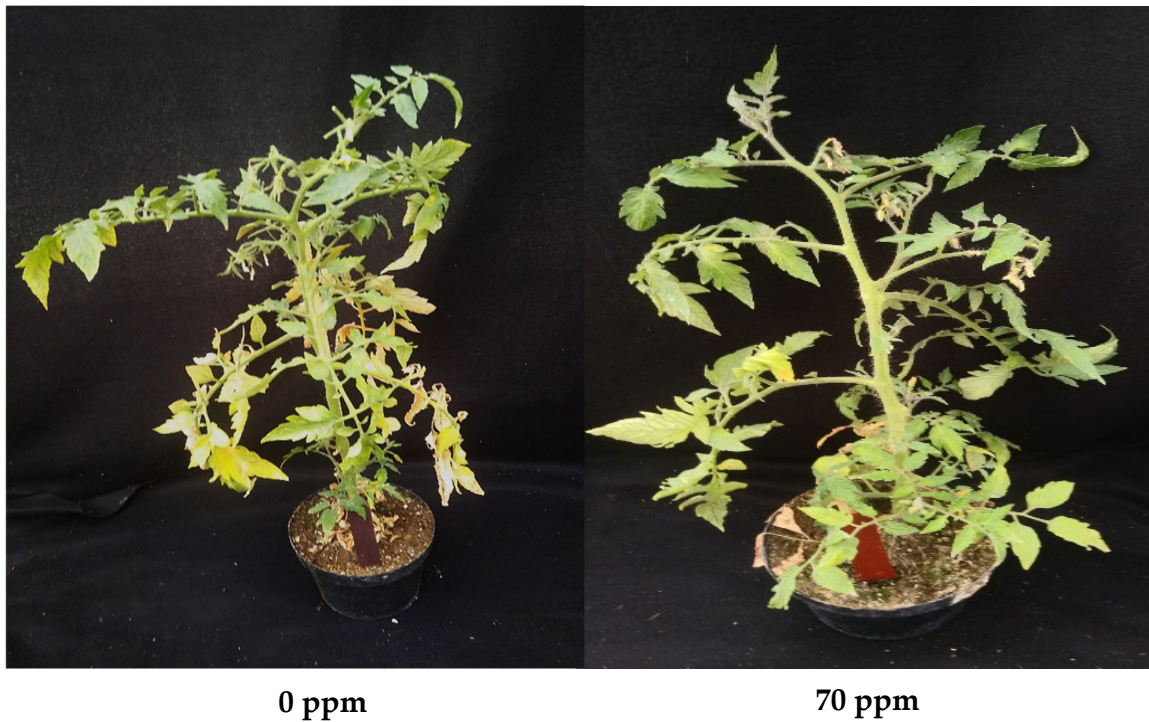

**Figure S4.** Infected plants of tomato (*Solanum lycopersicum*) with *Candidatus Liberibacter solanacearum* (CaLso) at 7 days of treatment with 70 ppm of PNB.

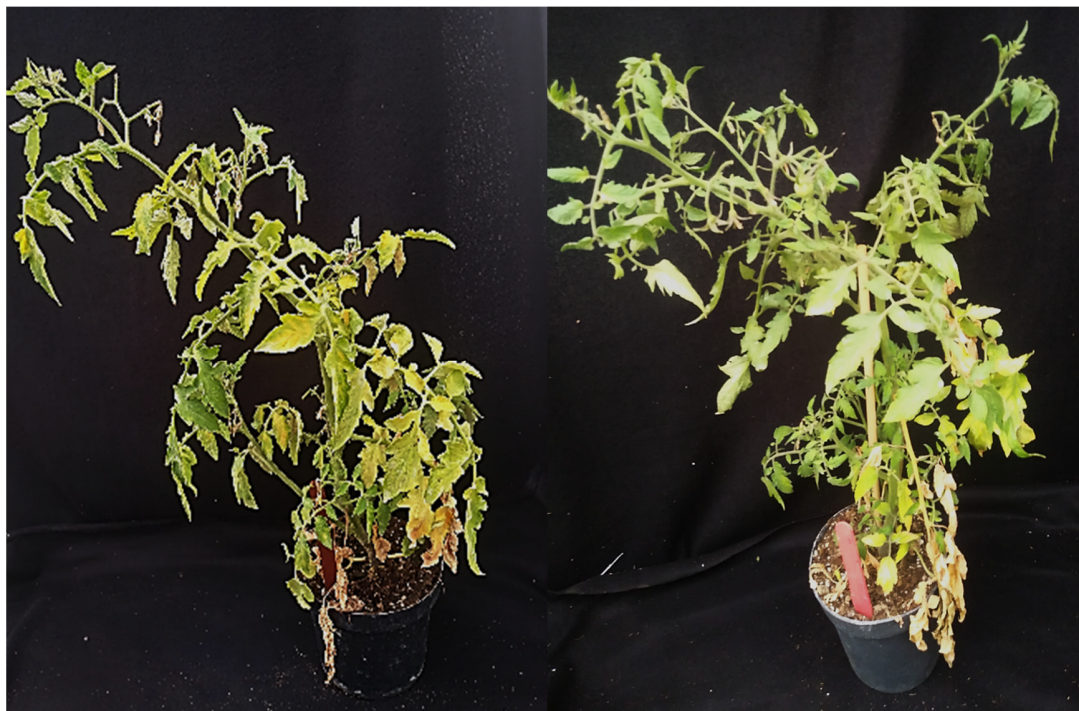

0 ppm

70 ppm

**Figure S5.** Infected plants of tomato (*Solanum lycopersicum*) with *Candidatus Liberibacter solanacearum* (CaLso) at 14 days of treatment with 70 ppm of PNB.



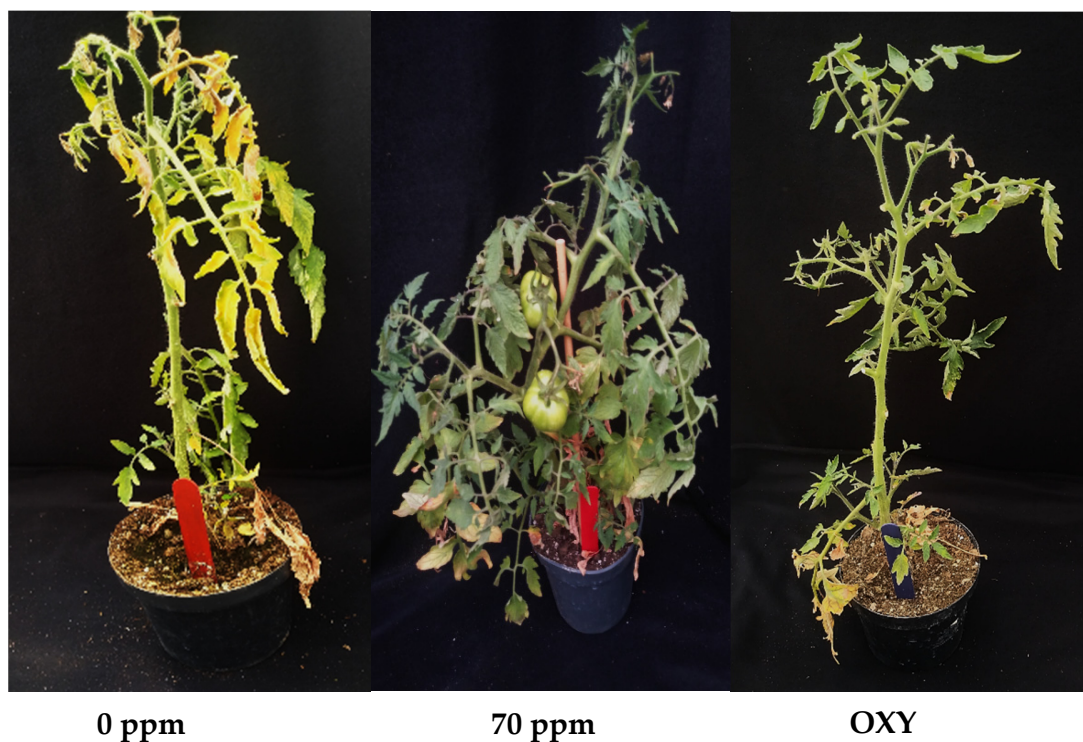

**Figure S6.** Infected plants of tomato (*Solanum lycopersicum*) with *Candidatus* Liberibacter solanacearum (*CaLso*) at 21 days of treatment with 70 ppm of PNB and oxytetracycline.
